# Supplementary material for: Artificial Protein Coronas Enable Controlled Interaction with Corneal Epithelial Cells: New Opportunities for Ocular Drug Delivery
Source: MDPI journal article supplement (doi:10.3390/pharmaceutics13060867), 2021-06-12
Supplement: s1 [file s1]

# Supplementary Materials: Artificial Protein Coronas Enable Controlled Interaction with Corneal Epithelial Cells: New Opportunities for Ocular Drug Delivery

Carlo Astarita, Sara Palchetti, Mina Massaro-Giordano, Marina Di Domenico, Francesco Petrillo, Silvia Boffo, Giulio Caracciolo and Antonio Giordano

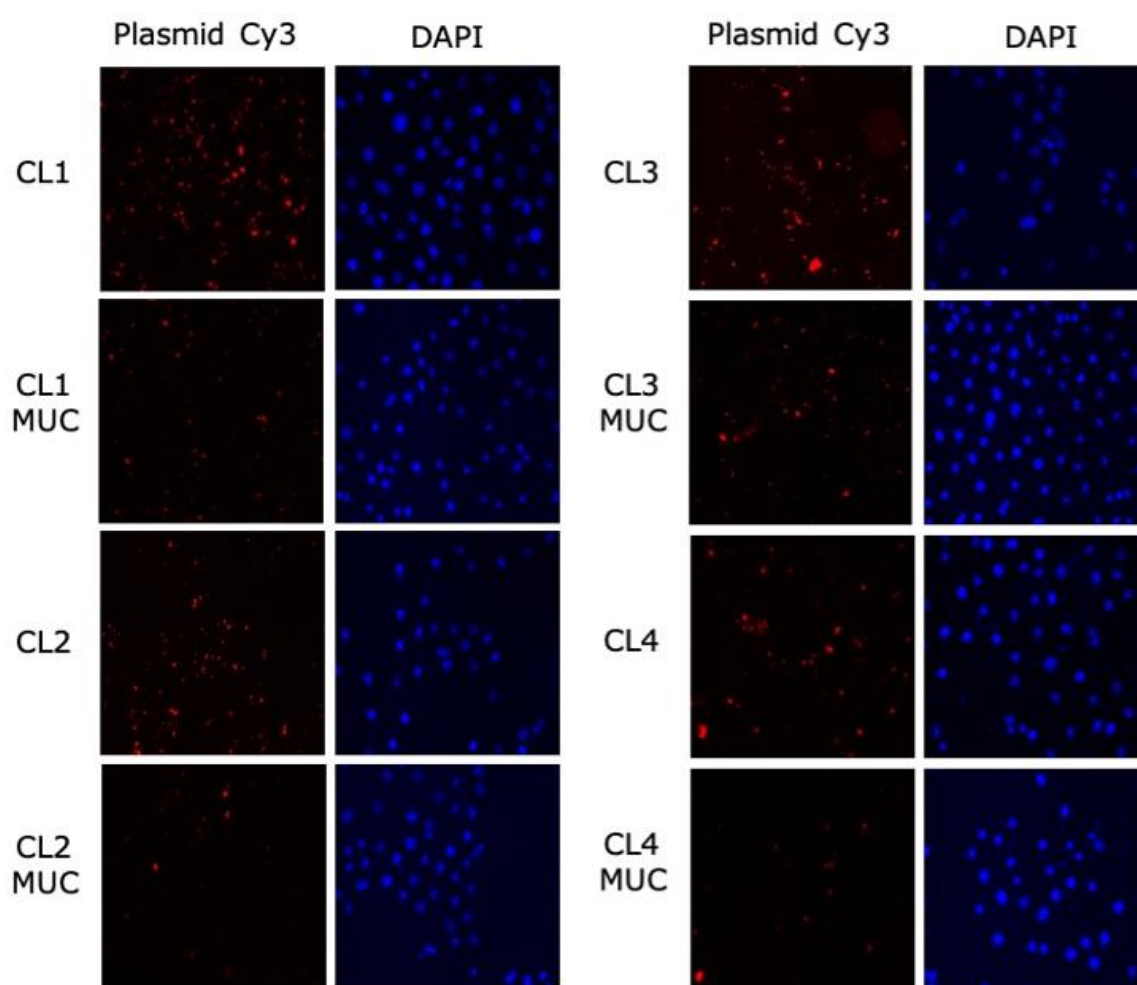

**Figure S1.** Representative images for subcellular localization of fluorescently labelled (red) pristine-LPX and MUC-bio-coronated lipoplexes in primary corneal epithelial cells after 60 min. treatment. Cell nuclei were stained with DAPI. Results are given as average of  $N = 3$  independent measurements  $\pm$  standard deviation.

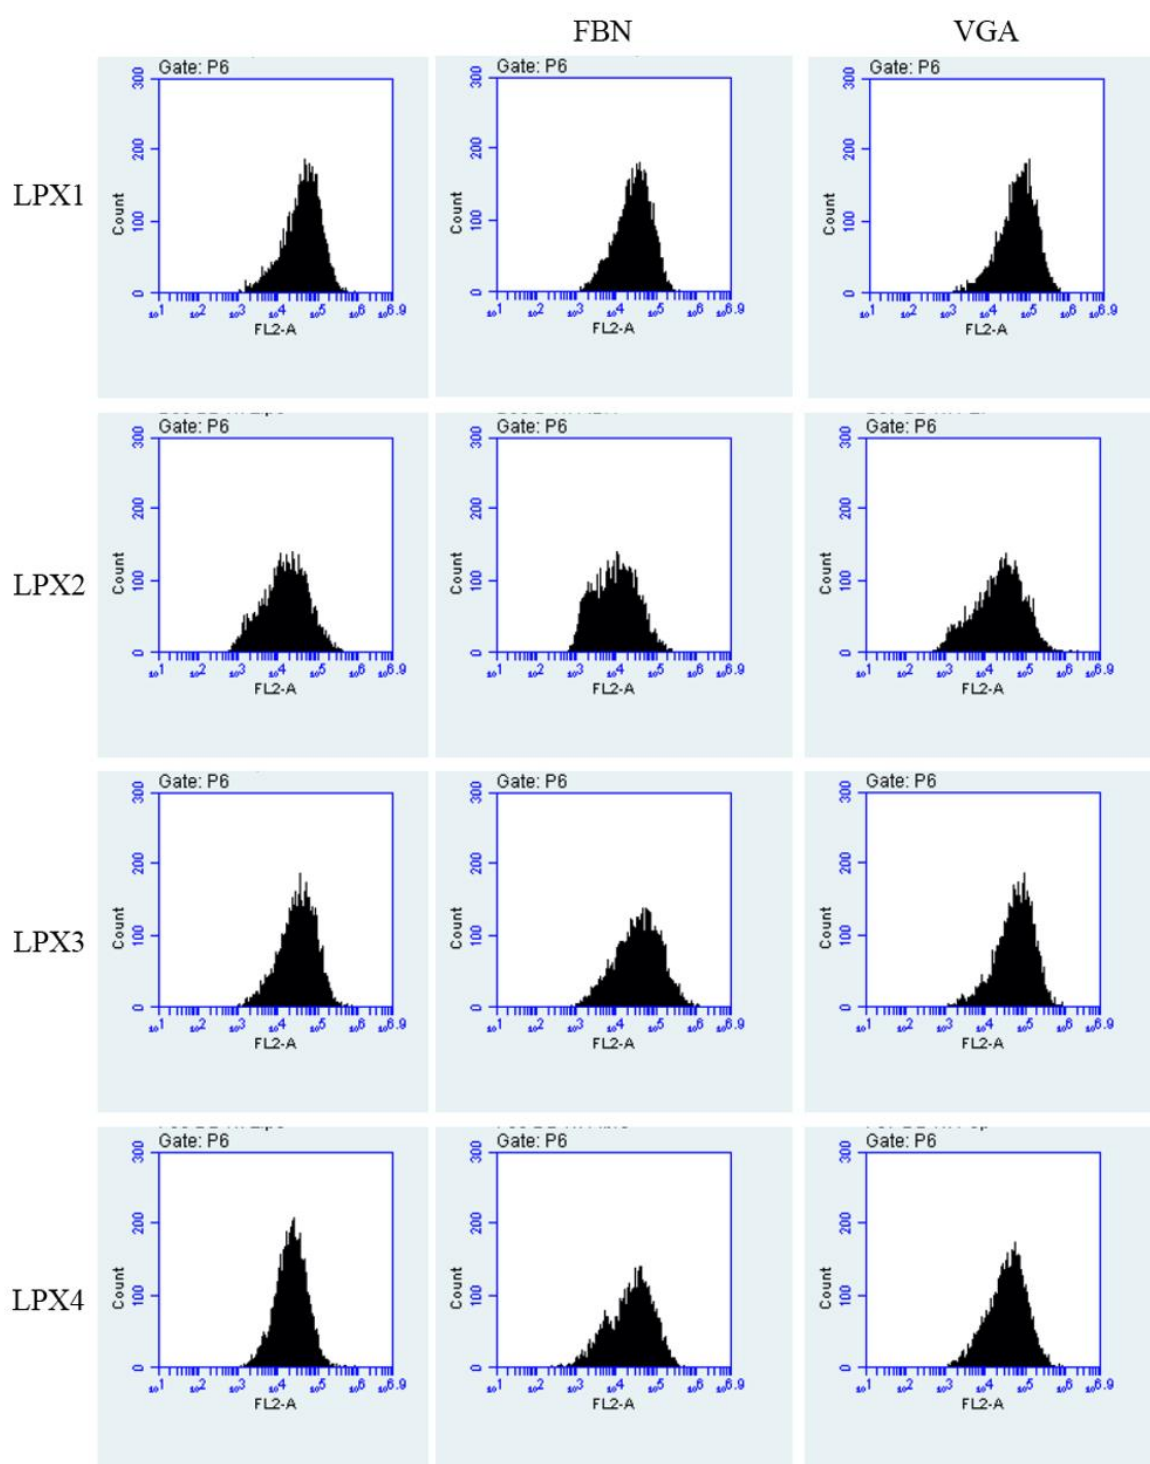

**Figure S2.** FACS analysis to assess the uptake by primary corneal epithelial cells following treatment with pristine lipoplexes (LPX), FBN-biocoronated lipoplexes and VGA-biocoronated lipoplexes. Results are given as average of  $N = 3$  independent measurements. Fluorescence acquired by 635nm laser excitation (filter 655–730nm).
